# Supplementary material
Source: publisher site journal article supplement (http://static.cambridge.org/content/id/urn:cambridge.org:id:article:S104161021800220X/resource/name/S104161021800220X_supp002.docx)
Supplement: Supplementary file 1 [file S104161021800220X_supp002.docx]

**Appendix A1 (.docx, 14.3KB):**

Description: Persons with dementia and their caregivers use these prompts directly or personalize them to describe their experience of misplacing objects.

**Appendix A1.** SymptomGuide™(SG) descriptions of misplacing objects

| **Description** |
| --- |
| Frequently misplaces common items (e.g. glasses brush TV remote keys) |
| Frequently misplaces important items or documents (e.g. money bills identification) |
| Wanders off with items and leaves them in uncommon places |
| Can remember using something but can't remember where they put it |
| Puts an item away for safekeeping then can't relocate the item |
| Notices something is not in its place and wonders where it went (e.g. a vase a clock) |
| Can't remember where things go (e.g. their proper place) |
| Puts things away in the wrong place |
| Puts things away in an odd place (e.g. eyeglasses in the freezer) |
| Always looking for something |
| Takes longer to locate missing items |
| Needs help from others to find missing items |
| Forgets what is lost while they are looking for the item |
| Hides or hoards items |

© DementiaGuide Inc., 2006. Used with permission
